# Supplementary material for: The clinical impact of phase offset errors and different correction methods in cardiovascular magnetic resonance phase contrast imaging: a multi-scanner study
Source: Springer Nature journal article supplement (doi:10.1186/s12968-020-00659-3), 2020-01-01
Supplement: MOESM2 [file 18386922]

# MASS

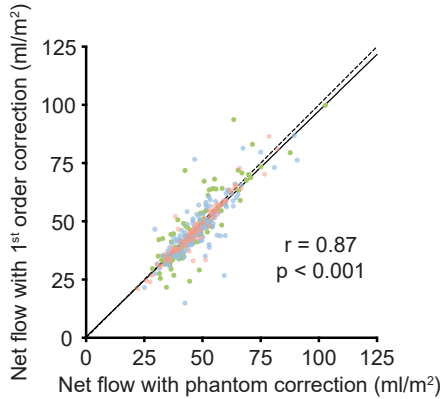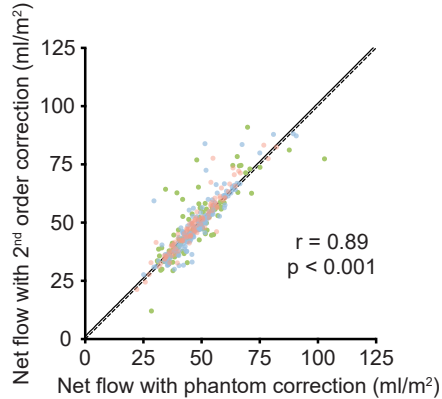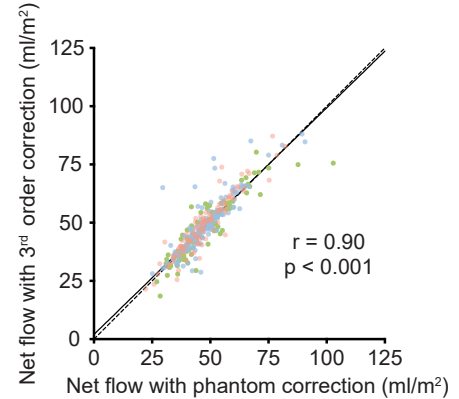

# Circle cvi42

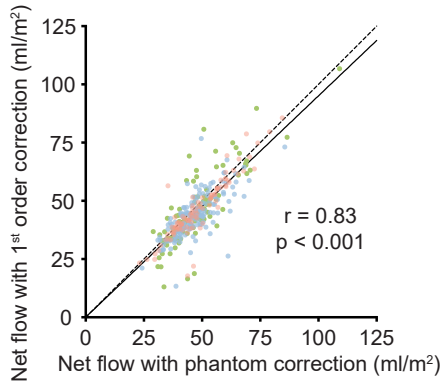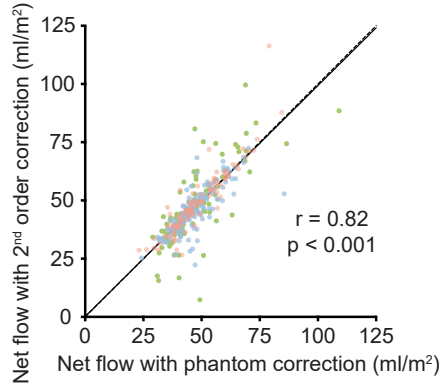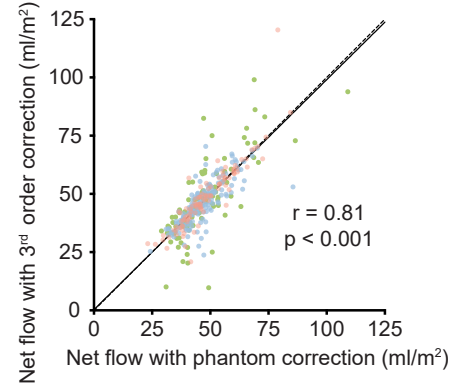

● CMR 1      ● CMR 2      ● CMR 3
