# Supplementary material for: The clinical impact of phase offset errors and different correction methods in cardiovascular magnetic resonance phase contrast imaging: a multi-scanner study
Source: Springer Nature journal article supplement (doi:10.1186/s12968-020-00659-3), 2020-01-01
Supplement: MOESM5 [file 18386922]

### Medis QFlow

**Phantom correction**

|               |          | No  | Mild | Moderate | Severe |     |
|---------------|----------|-----|------|----------|--------|-----|
| No correction | No       | 238 | 2    | 0        | 0      | 240 |
|               | Mild     | 17  | 23   | 4        | 1      | 45  |
|               | Moderate | 1   | 3    | 18       | 6      | 28  |
|               | Severe   | 1   | 0    | 2        | 30     | 33  |
|               |          | 257 | 28   | 24       | 37     |     |

**Phantom correction**

|                                          |          | No  | Mild | Moderate | Severe |     |
|------------------------------------------|----------|-----|------|----------|--------|-----|
| First order stationary tissue correction | No       | 223 | 2    | 0        | 0      | 225 |
|                                          | Mild     | 31  | 21   | 5        | 1      | 58  |
|                                          | Moderate | 1   | 3    | 17       | 6      | 27  |
|                                          | Severe   | 2   | 2    | 2        | 30     | 36  |
|                                          |          | 257 | 28   | 24       | 37     |     |

### MASS

**Phantom correction**

|               |          | No  | Mild | Moderate | Severe |     |
|---------------|----------|-----|------|----------|--------|-----|
| No correction | No       | 236 | 15   | 1        | 1      | 252 |
|               | Mild     | 5   | 24   | 5        | 1      | 35  |
|               | Moderate | 0   | 2    | 18       | 7      | 27  |
|               | Severe   | 0   | 0    | 0        | 32     | 32  |
|               |          | 241 | 41   | 24       | 40     |     |

**Phantom correction**

|                                          |          | No  | Mild | Moderate | Severe |     |
|------------------------------------------|----------|-----|------|----------|--------|-----|
| First order stationary tissue correction | No       | 223 | 7    | 1        | 1      | 232 |
|                                          | Mild     | 16  | 30   | 5        | 1      | 51  |
|                                          | Moderate | 0   | 2    | 14       | 10     | 26  |
|                                          | Severe   | 2   | 2    | 4        | 29     | 37  |
|                                          |          | 241 | 41   | 24       | 40     |     |

**Phantom correction**

|                                           |          | No  | Mild | Moderate | Severe |     |
|-------------------------------------------|----------|-----|------|----------|--------|-----|
| Second order stationary tissue correction | No       | 231 | 16   | 2        | 1      | 250 |
|                                           | Mild     | 9   | 21   | 5        | 1      | 36  |
|                                           | Moderate | 0   | 4    | 14       | 5      | 23  |
|                                           | Severe   | 1   | 0    | 3        | 33     | 37  |
|                                           |          | 241 | 41   | 24       | 40     |     |

**Phantom correction**

|                                          |          | No  | Mild | Moderate | Severe |     |
|------------------------------------------|----------|-----|------|----------|--------|-----|
| Third order stationary tissue correction | No       | 231 | 14   | 1        | 1      | 247 |
|                                          | Mild     | 9   | 22   | 5        | 0      | 36  |
|                                          | Moderate | 1   | 5    | 15       | 2      | 23  |
|                                          | Severe   | 0   | 0    | 3        | 37     | 40  |
|                                          |          | 241 | 41   | 24       | 40     |     |

### Circle cvi42

**Phantom correction**

|               |          | No  | Mild | Moderate | Severe |     |
|---------------|----------|-----|------|----------|--------|-----|
| No correction | No       | 227 | 4    | 0        | 0      | 231 |
|               | Mild     | 23  | 25   | 3        | 1      | 52  |
|               | Moderate | 1   | 3    | 21       | 5      | 30  |
|               | Severe   | 1   | 0    | 3        | 29     | 33  |
|               |          | 252 | 32   | 27       | 35     |     |

**Phantom correction**

|                                          |          | No  | Mild | Moderate | Severe |     |
|------------------------------------------|----------|-----|------|----------|--------|-----|
| First order stationary tissue correction | No       | 189 | 1    | 0        | 0      | 190 |
|                                          | Mild     | 57  | 22   | 4        | 0      | 83  |
|                                          | Moderate | 2   | 5    | 16       | 6      | 29  |
|                                          | Severe   | 4   | 4    | 7        | 29     | 44  |
|                                          |          | 252 | 32   | 27       | 35     |     |

**Phantom correction**

|                                           |          | No  | Mild | Moderate | Severe |     |
|-------------------------------------------|----------|-----|------|----------|--------|-----|
| Second order stationary tissue correction | No       | 223 | 10   | 0        | 0      | 233 |
|                                           | Mild     | 24  | 18   | 5        | 0      | 47  |
|                                           | Moderate | 5   | 3    | 16       | 4      | 28  |
|                                           | Severe   | 0   | 1    | 6        | 31     | 38  |
|                                           |          | 252 | 32   | 27       | 35     |     |

**Phantom correction**

|                                          |          | No  | Mild | Moderate | Severe |     |
|------------------------------------------|----------|-----|------|----------|--------|-----|
| Third order stationary tissue correction | No       | 220 | 7    | 0        | 0      | 227 |
|                                          | Mild     | 27  | 19   | 5        | 0      | 51  |
|                                          | Moderate | 4   | 4    | 17       | 3      | 28  |
|                                          | Severe   | 1   | 2    | 5        | 32     | 40  |
|                                          |          | 252 | 32   | 27       | 35     |     |
